# Supplementary material for: Field emission properties of highly ordered low-aspect ratio carbon nanocup arrays
Source: Royal Society of Chemistry journal article supplement (doi:10.1039/c5ra25682h), 2016-01-01
Supplement: c5ra25682h1.pdf [file c5ra25682h1.pdf]

## **†Electronic Supplementary Information (ESI)**

### **Field emission properties of highly ordered low-aspect ratio carbon nanocup arrays**

Bipin Kumar Gupta<sup>a,\*</sup>, Garima Kedawat<sup>b</sup>, Pawan Kumar<sup>a,c</sup>, Satbir Singh<sup>a,c</sup>, Sachin R. Suryawanshi<sup>d</sup>, Neetu Agrawal (Garg)<sup>b</sup>, Govind Gupta<sup>a</sup>, Ah Ra Kim<sup>e</sup>, R. K. Gupta<sup>f</sup>, Mahendra A. More<sup>d</sup>, Dattatray J. Late<sup>g,\*</sup>, Myung Gwan Hahm<sup>e,\*</sup>

<sup>a</sup>CSIR - National Physical Laboratory, Dr K S Krishnan Road, New Delhi, 110012, India, <sup>b</sup>Department of Physics, Kalindi College, University of Delhi, New Delhi, 110008, India, <sup>c</sup>Academy of Scientific and Innovative Research (AcSIR), CSIR – National Physical Laboratory campus, New Delhi – 110012, India <sup>d</sup>Centre for Advanced Studies in Materials Science and Condensed Matter Physics, Department of Physics, University of Pune, Pune 411007, India, <sup>e</sup>Department of Advanced functional thin films, surface technology division, Korea institute of material science (KIMS), 797 Changwondaero, Sungsan-GU, Changwon, Gyeongnam, 642-831, Republic of Korea, <sup>f</sup>Department of Chemistry, Pittsburg State University, Pittsburg, KS, 66762, USA, <sup>g</sup>Physical & Materials Chemistry Division, CSIR-National Chemical Laboratory, Pashan Road, Pune 411008, India.

\* Corresponding author. Tel.: +91-11-45608284, Fx: +91-11-45609310

E-mail address: [bipinbhu@yahoo.com](mailto:bipinbhu@yahoo.com) (B.K.G.), [dj.late@ncl.res.in](mailto:dj.late@ncl.res.in) (D. J. L.), [mghahm@kims.re.kr](mailto:mghahm@kims.re.kr) (M.G.H.)

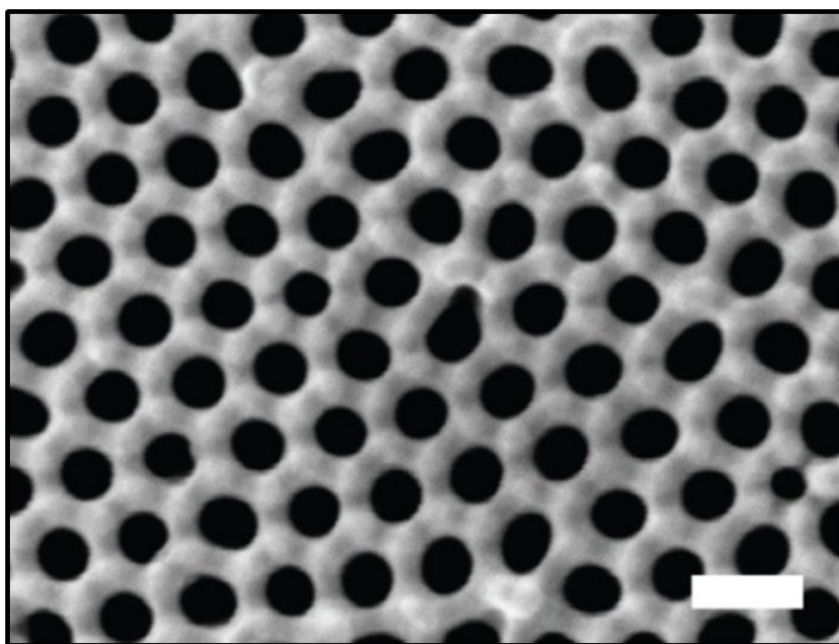

**Figure S1.** Top-view of CNC array on the AAO template, the scale bar is 100 nm.

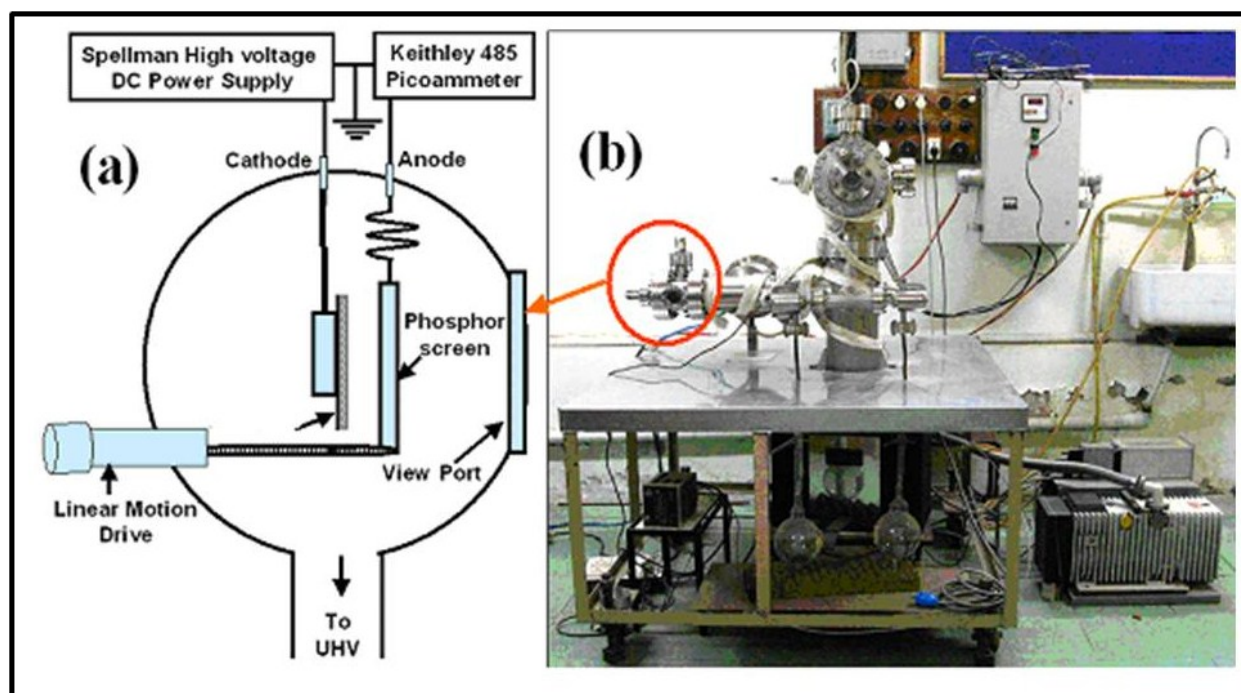

**Figure S2.** The field emission measurement instrument.

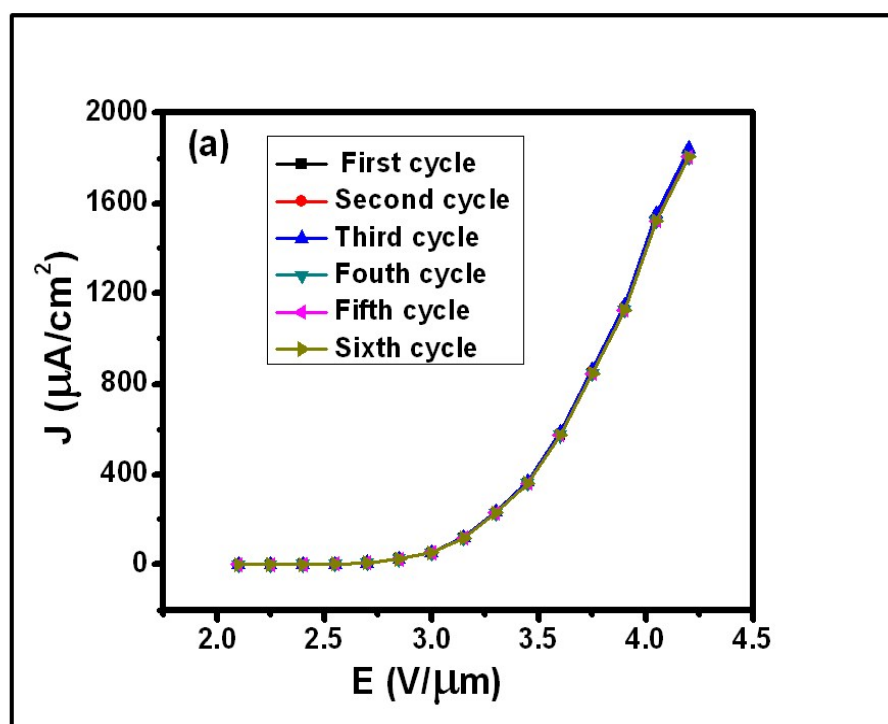

**Figure S3a.** Field emission characteristics of CNC sample from 1<sup>st</sup> to 6<sup>th</sup> cycle run, showing better emission stability.

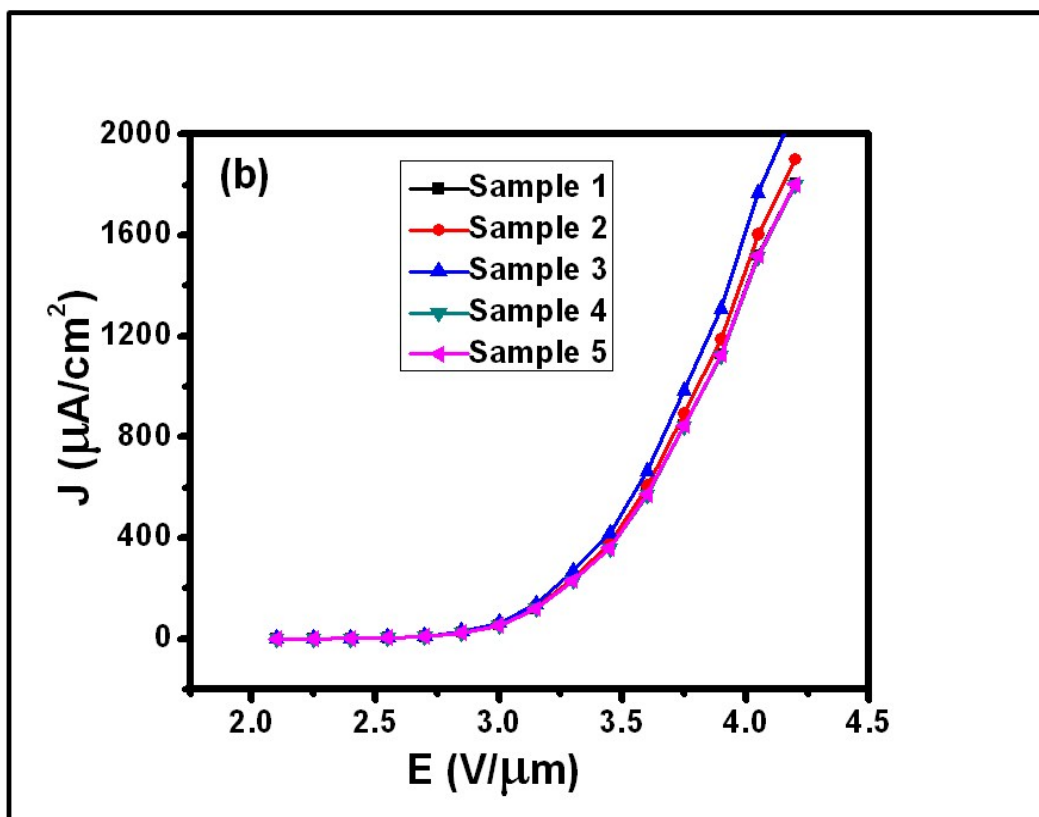

**Figure S3 (b).** Field emission characteristics of different as-synthesized samples of CNC samples (sample 1, sample 2, sample 3, sample 4 and sample 5). As evident from figure, all five samples are having almost similar FE behaviour indicating good reproducibility.
